# Supplementary material
Source: PubMed Central journal article supplement (PMC3933005)
Supplement: NIHMS447054-supplement-335_2013_9448_MOESM1_ESM.pdf [file NIHMS447054-supplement-335_2013_9448_MOESM1_ESM.pdf]

## Supplemental Tables Legends

### **Table S1**

Strain averages and standard errors for hematological parameters: GRAN (Granulocyte Cell Counts [ $10^3/\mu\text{l}$ ]), HCT (Hematocrit [%]), HGB (Hemoglobin [g/dl]), LYMPH (Lymphocyte Cell Counts [ $10^3/\mu\text{l}$ ]), MCHC (Mean Corpuscular Hemoglobin Concentration [g/dl]), MCV (Mean Corpuscular Volume [fl]), MONO (Monocyte Cell Counts [ $10^3/\mu\text{l}$ ]), RBC (Red Blood Cell Count [ $10^6/\mu\text{l}$ ]), RDW% (Red Cell Distribution Width [%]), WBC (White Blood Cell Counts [ $10^3/\mu\text{l}$ ]).

### **Table S2**

Trait-trait correlations for hematological phenotypes

### **Table S3**

R<sup>2</sup> values between red blood cell loci

### **Table S4**

R<sup>2</sup> values between white cell loci
