# Supplementary material
Source: PubMed Central journal article supplement (PMC3933005)
Supplement: NIHMS447054-supplement-335_2013_9448_MOESM2_ESM.pdf [file NIHMS447054-supplement-335_2013_9448_MOESM2_ESM.pdf]

| Strain      | GRAN     |          | HCT      |          | HGB      |          | LYMPH    |          | MCHC     |          | MCV      |          |
|-------------|----------|----------|----------|----------|----------|----------|----------|----------|----------|----------|----------|----------|
| A/J         | 0.4      | 0.1      | 29.15    | 3.55     | 9.3      | 1.1      | 0.9      | 0.1      | 31.95    | 0.15     | 47.85    | 0.05     |
| AXB10/PgnJ  | 0.3      | 0.1      | 29.9     | 0.5      | 10.7     | 0.2      | 0.85     | 0.15     | 35.75    | 0.15     | 44.15    | 0.25     |
| AXB12/PgnJ  | 0.45     | 0.35     | 35.75    | 4.15     | 11.55    | 1.05     | 1.45     | 0.75     | 32.45    | 0.75     | 48.7     | 0.3      |
| AXB13/PgnJ  | 0.625    | 0.143614 | 43.15    | 1.980109 | 13.375   | 0.495606 | 2.9      | 0.481318 | 31.075   | 0.319831 | 46.675   | 0.352077 |
| AXB15/PgnJ  | 0.3      | 0.2      | 24.35    | 2.05     | 9.2      | 0.9      | 0.8      | 0.4      | 37.85    | 0.55     | 41.3     | 0.1      |
| AXB19/PgnJ  | 0.425    | 0.075    | 38.075   | 1.449353 | 13.85    | 0.483908 | 2.175    | 0.249583 | 36.475   | 0.149304 | 42.625   | 0.047871 |
| AXB19b/PgnJ | 0.433333 | 0.076012 | 31.6     | 3.69441  | 11.55    | 1.18596  | 2.083333 | 0.677946 | 37.03333 | 0.766667 | 42.61667 | 0.336072 |
| AXB2/PgnJ   | 0.2      | 0        | 29.55    | 19.85    | 9.55     | 6.05     | 0.9      | 0.7      | 34.05    | 2.55     | 47.35    | 0.95     |
| AXB23/PgnJ  | 0.525    | 0.118145 | 37.175   | 5.934697 | 11.65    | 1.751904 | 1.8      | 0.380789 | 31.675   | 0.476751 | 47.525   | 0.442295 |
| AXB24/PgnJ  | 0.65     | 0.25     | 37.55    | 1.85     | 13.1     | 0.7      | 2.85     | 1.25     | 34.9     | 0.1      | 43.85    | 0.05     |
| AXB4/PgnJ   | NA       | NA       | 34.65    | 6.05     | 13.15    | 1.95     | NA       | NA       | 38.2     | 1        | 38.7     | 0.1      |
| AXB5/PgnJ   | 0.55     | 0.155456 | 38.25    | 3.393744 | 12       | 0.825631 | 1.975    | 0.594944 | 31.675   | 0.992786 | 52.325   | 0.462556 |
| AXB6/PgnJ   | 0.8      | 0.3      | 46.425   | 2.381657 | 14.55    | 0.658913 | 3.225    | 0.991947 | 31.375   | 0.306526 | 46.875   | 0.085391 |
| AXB8/PgnJ   | 0.7      | 0.1      | 34.6     | 4.7      | 12.65    | 1.65     | 2.5      | 0.6      | 36.7     | 0.2      | 41.1     | 0.2      |
| BALB/cJ     | 0.45     | 0.15     | 45.3     | 3        | 13.95    | 0.95     | 1.25     | 0.45     | 30.85    | 0.05     | 50.15    | 0.15     |
| BTBR        | 1.05     | 0.15     | 41.7     | 1        | 12.9     | 0.1      | 3.25     | 0.55     | 31       | 0.6      | 51.55    | 0.45     |
| BUB/BnJ     | 0.7      | NA       | 45.7     | NA       | 13.8     | NA       | 1.6      | NA       | 30.2     | NA       | 51.7     | NA       |
| BXA1/PgnJ   | 0.4      | NA       | 33.5     | NA       | 12.7     | NA       | 1        | NA       | 37.9     | NA       | 39.9     | NA       |
| BXA11/PgnJ  | 0.6      | 0.1      | 39.85    | 3.65     | 12.35    | 0.95     | 1.95     | 0.25     | 31.1     | 0.4      | 49.55    | 0.45     |
| BXA12/PgnJ  | 1.4      | 0.9      | 32.65    | 4.65     | 11.5     | 1.3      | 4.55     | 2.45     | 35.55    | 1.15     | 41.85    | 0.55     |
| BXA13/PgnJ  | 0.4      | 0.1      | 48       | 0.6      | 15.1     | 0.2      | 1.6      | 0.1      | 31.45    | 0.05     | 48.05    | 0.05     |
| BXA14/PgnJ  | 0.45     | 0.15     | 37.1     | 6.7      | 11.6     | 1.7      | 1.3      | 0.3      | 31.5     | 1.1      | 47.5     | 0.9      |
| BXA16/PgnJ  | 0.8      | 0.321455 | 27.23333 | 7.844389 | 10.23333 | 2.741249 | 2.3      | 1.044031 | 38.3     | 1.159023 | 38.93333 | 0.883805 |
| BXA2/PgnJ   | 0.5      | 0.1      | 37.5     | 1.7      | 13.45    | 0.35     | 1.65     | 0.45     | 35.95    | 0.65     | 40.85    | 0.35     |
| BXA24/PgnJ  | 0.4      | 0.3      | 36.95    | 1.25     | 13.15    | 0.45     | 1.4      | 0.8      | 35.65    | 0.05     | 42.85    | 0.15     |
| BXA25/PgnJ  | 0.6      | 0.3      | 21.1     | 6.6      | 7.9      | 1.8      | 0.9      | 0.4      | 38.9     | 3.6      | 38.6     | 0.1      |
| BXA26/PgnJ  | 0.5      | 0.1      | 45.25    | 3.55     | 13.85    | 0.85     | 2.45     | 1.35     | 30.7     | 0.5      | 50.45    | 0.15     |
| BXA4/PgnJ   | 0.1      | 0        | 34.2     | 7.7      | 11.15    | 1.95     | 0.5      | 0.1      | 33.1     | 1.8      | 48.05    | 0.45     |
| BXA7/PgnJ   | 0.5      | 0.3      | 40.05    | 1.45     | 13.05    | 0.45     | 1.9      | 1        | 32.65    | 0.05     | 46.4     | 0.1      |
| BXA8/PgnJ   | 0.4      | 0        | 35.85    | 3.85     | 12.85    | 1.35     | 1.2      | 0.1      | 36       | 0.1      | 40.35    | 0.35     |
| BXD1/TyJ    | 0.4      | NA       | 42.7     | NA       | 14.7     | NA       | 4.3      | NA       | 34.4     | NA       | 41.7     | NA       |
| BXD11/TyJ   | 0.3      | NA       | 29.8     | NA       | 11.1     | NA       | 1.2      | NA       | 37.5     | NA       | 39.6     | NA       |
| BXD12/TyJ   | 1.15     | 0.05     | 38.15    | 0.75     | 11.55    | 0.05     | 2.15     | 0.15     | 30.35    | 0.35     | 48.9     | 0.3      |
| BXD13/TyJ   | 0.7      | 0.4      | 35.3     | 5        | 11.3     | 1.4      | 2.75     | 1.55     | 32.2     | 0.6      | 41.6     | 0.7      |
| BXD14/TyJ   | 0.45     | 0.15     | 39.65    | 7.35     | 12.95    | 1.75     | 1.3      | 0.4      | 33.05    | 1.75     | 45.7     | 0.9      |
| BXD15/TyJ   | 0.55     | 0.05     | 37.5     | 0.9      | 11.9     | 0.3      | 2.45     | 0.15     | 31.7     | 0        | 42       | 0.1      |
| BXD18/TyJ   | 0.1      | NA       | 17.2     | NA       | 6.9      | NA       | 0.3      | NA       | 40.2     | NA       | 43.4     | NA       |
| BXD19/TyJ   | 0.75     | 0.133542 | 33.6     | 5.365134 | 11.36667 | 1.688128 | 1.966667 | 0.464519 | 34.76667 | 1.304522 | 40.38333 | 1.607569 |
| BXD2/TyJ    | 0.35     | 0.05     | 24.9     | 10.2     | 9.4      | 3.4      | 1.05     | 0.45     | 38.7     | 2.2      | 37.95    | 0.85     |
| BXD20/TyJ   | NA       | NA       | 41.5     | 1.9      | 14.95    | 0.85     | NA       | NA       | 36.1     | 0.4      | 38.2     | 0        |
| BXD22/TyJ   | 0.85     | 0.25     | 32.3     | 12       | 13       | 2.8      | 3.5      | 1.2      | 43       | 7.3      | 38.3     | 1.4      |
| BXD24/TyJ   | 0.8      | 0.1      | 35.55    | 8.85     | 12.85    | 1.65     | 2.8      | 0.8      | 37.4     | 4.8      | 44.8     | 0.3      |
| BXD24/TyJ   | 0.55     | 0.05     | 35.55    | 0.35     | 11.55    | 0.25     | 1.6      | 0        | 32.6     | 0.3      | 45.25    | 0.35     |
| BXD27/TyJ   | 0.4      | NA       | 26.4     | NA       | 9.5      | NA       | 1.5      | NA       | 36.1     | NA       | 39.5     | NA       |
| BXD28/TyJ   | 0.8      | 0.2      | 41.65    | 1.95     | 13.25    | 0.45     | 3.35     | 0.95     | 31.8     | 0.3      | 43.95    | 0.05     |
| BXD29TyJ    | 0.9      | 0.4      | 34.65    | 0.55     | 12.55    | 0.25     | 2.2      | 0.9      | 36.15    | 0.15     | 39.95    | 0.05     |
| BXD32/TyJ   | 0.7      | 0.147196 | 41.625   | 3.656814 | 13.75    | 0.651281 | 2.35     | 0.523609 | 33.5     | 1.756891 | 43.35    | 1.087428 |
| BXD33/TyJ   | 1        | 0        | 26.75    | 1.15     | 9.7      | 0.5      | 2.75     | 0.35     | 36.35    | 0.25     | 42.7     | 0.4      |
| BXD34/TyJ   | 0.6      | 0.3      | 40.5     | 4.2      | 12.6     | 0.9      | 1.65     | 0.95     | 31.2     | 1        | 47.2     | 0        |
| BXD38/TyJ   | 0.6      | 0.1      | 33.35    | 2.85     | 12.05    | 0.95     | 1.8      | 0.1      | 36.1     | 0.2      | 38.5     | 0.6      |
| BXD39/TyJ   | 0.7      | NA       | 23.9     | NA       | 8.8      | NA       | 2        | NA       | 36.9     | NA       | 42.4     | NA       |
| BXD40/TyJ   | 0.4      | 0.3      | 24.1     | 1.6      | 9.7      | 0.4      | 1.5      | 1        | 40.85    | 4.35     | 39.4     | 0.1      |
| BXD42/TyJ   | 1.5      | 0.4      | 46.35    | 3.55     | 14.5     | 1.1      | 4        | 1        | 31.3     | 0        | 43.7     | 0.6      |
| BXD5/TyJ    | 0.75     | 0.35     | 36.75    | 2.75     | 11.85    | 0.65     | 2.05     | 0.55     | 32.25    | 0.65     | 44       | 0.7      |
| BXD6/TyJ    | 0.7      | 0.091287 | 36.825   | 2.996491 | 13.375   | 1.030675 | 2.35     | 0.377492 | 36.375   | 0.188746 | 39.8     | 0.122474 |
| BXD8/TyJ    | NA       | NA       | 34.4     | 2.6      | 12.5     | 0.9      | NA       | NA       | 36.4     | 0.1      | 39.55    | 0.05     |
| BXD9/TyJ    | 0.85     | 0.35     | 36.7     | 9.6      | 11.35    | 2.85     | 4.5      | 2        | 31.1     | 0.4      | 46.65    | 0.25     |
| BXH10/TyJ   | 0.5      | NA       | 38.7     | NA       | 11.7     | NA       | 1.4      | NA       | 30.3     | NA       | 45.8     | NA       |
| BXH14/TyJ   | 0.6      | 0.2      | 41.4     | 0.3      | 14.75    | 0.15     | 1.5      | 0.4      | 35.65    | 0.05     | 42.1     | 0.6      |
| BXH19/TyJ   | 0.4      | 0        | 29.15    | 4.65     | 10.65    | 1.65     | 1.05     | 0.15     | 36.7     | 0.3      | 42.3     | 0.4      |
| BXH2/TyJ    | 0.8      | 0.4      | 26.45    | 5.15     | 9.5      | 1.5      | 1.4      | 0.7      | 36.4     | 1.4      | 42.9     | 0.9      |
| BXH20/KccJ  | 0.75     | 0.15     | 31.8     | 1.5      | 11.75    | 0.65     | 1.95     | 0.05     | 36.9     | 0.3      | 43.95    | 0.05     |
| BXH22/KccJ  | 0.7      | NA       | 27.4     | NA       | 9.9      | NA       | 1.9      | NA       | 36.2     | NA       | 41.5     | NA       |
| BXH4/TyJ    | 1.15     | 0.65     | 42.7     | 4.218412 | 13.325   | 1.116076 | 2.8      | 1.5      | 31.425   | 0.636887 | 51.025   | 0.42106  |
| BXH6/TyJ    | 0.75     | 0.15     | 33       | 5.7      | 11.5     | 0.8      | 1.8      | 0.3      | 35.6     | 3.8      | 51.15    | 0.55     |
| BXH7/TyJ    | 0.4      | 0.1      | 17.6     | 1.8      | 6.8      | 0.4      | 0.8      | 0.2      | 38.9     | 1.7      | 42.55    | 0.35     |
| BXH8/TyJ    | 0.55     | 0.05     | 43.05    | 0.05     | 13.15    | 0.05     | 1.65     | 0.15     | 30.55    | 0.15     | 48.35    | 0.05     |
| BXH9/TyJ    | 0.95     | 0.25     | 37.75    | 3.35     | 11.95    | 0.95     | 2.4      | 0.4      | 31.65    | 0.25     | 50.35    | 0.25     |
| C57BL/6J    | 0.533333 | 0.233333 | 24.9     | 5.139066 | 9.9      | 1.289703 | 1.766667 | 1.017076 | 41.23333 | 4.676656 | 41.66667 | 0.523874 |
| C57L/J      | 0.7      | 0.3      | 39.15    | 1.55     | 13.85    | 0.65     | 2.2      | 0.5      | 35.35    | 0.35     | 43.4     | 0.1      |
| C58/J       | 0.85     | 0.35     | 36.45    | 8.55     | 12.75    | 2.75     | 2.35     | 1.05     | 35.3     | 0.7      | 43.5     | 0.7      |
| CAST/EiJ    | 1.3      | 0.5      | 50.65    | 1.55     | 14.5     | 0.3      | 3.2      | 1        | 28.65    | 0.35     | 49.85    | 0.85     |
| CE/J        | 0.75     | 0.05     | 33.85    | 0.25     | 12.8     | 0.6      | 1.95     | 0.45     | 37.8     | 1.6      | 41.4     | 0        |
| CXB1/ByJ    | 1.1125   | 0.209112 | 40.5     | 0.56093  | 14.85    | 0.275162 | 4.825    | 0.794569 | 36.6625  | 0.33961  | 39.9     | 0.163663 |
| CXB11/HiAJ  | 1.925    | 0.340037 | 41.85    | 1.090708 | 14.8125  | 0.331898 | 6.225    | 0.859142 | 35.5125  | 0.208256 | 39.675   | 0.135949 |
| CXB12/HiAJ  | 1.7625   | 0.235991 | 53.7     | 1.089233 | 16.275   | 0.280783 | 7.1875   | 0.419795 | 30.3625  | 0.332167 | 50.0375  | 0.244173 |
| CXB13/HiAJ  | 1.625    | 0.265081 | 54.325   | 0.847423 | 16.575   | 0.184923 | 5.3125   | 0.972926 | 30.55    | 0.254951 | 45.375   | 0.260323 |
| CXB2/ByJ    | 0.816667 | 0.14004  | 43.26667 | 2.33219  | 15.6     | 0.761139 | 2.55     | 0.287228 | 36.15    | 0.356604 | 41.93333 | 0.540165 |
| CXB3/ByJ    | 1.1      | 0.179505 | 47.08889 | 2.596977 | 14.52222 | 0.722991 | 3.122222 | 0.312596 | 30.96667 | 0.295804 | 48.78889 | 0.672979 |
| CXB4/ByJ    | 1.5375   | 0.338029 | 45.075   | 0.391312 | 15.8375  | 0.171065 | 5.1125   | 0.395256 | 35.1625  | 0.194512 | 41.125   | 0.077344 |
| CXB6/ByJ    | 1.071429 | 0.114879 | 38.34286 | 1.494571 | 13.74286 | 0.47802  | 2.528571 | 0.411567 | 35.9     | 0.267261 | 42.42857 | 0.132223 |
| CXB7/ByJ    | 1.8      | 0.263674 | 45.04286 | 0.229759 | 16.4     | 0.106904 | 4.157143 | 0.491769 | 36.47143 | 0.196049 | 40.17143 | 0.19726  |
| CXB8/HiAJ   | 1.06     | 0.263818 | 51.3     | 1.664332 | 15.88    | 0.596154 | 3.24     | 0.3995   | 30.96    | 0.242074 | 46.62    | 0.387814 |
| CXB9/HiAJ   | 1.35     | 0.446281 | 40.11429 | 1.236051 | 14       | 0.365148 | 4.433333 | 1.396583 | 34.97143 | 0.342758 | 44.62857 | 0.257011 |
| DBA/2J      | 1.05     | 0.15     | 38.65    | 5.05     | 11.8     | 1.3      | 2.7      | 0.5      | 30.75    | 0.65     | 44.15    | 0.15     |
| FVB/NJ      | 0.7      | 0        | 32.95    | 0.05     | 10.15    | 0.05     | 1.6      | 0.2      | 30.75    | 0.15     | 48.6     | 0.2      |
| I/LnJ       | 0.9      | NA       | 28.2     | NA       | 9.3      | NA       | 1.4      | NA       | 33.2     | NA       | 43.6     | NA       |
| KK/HIJ      | 0.6      | 0        | 28       | 1.3      | 10.8     | 0.4      | 0.95     | 0.15     | 38.55    | 0.25     | 39.25    | 0.45     |
| LG/J        | 1.3      | 0.3      | 49.4     | 5.4      | 15.45    | 1.45     | 3.1      | 1.4      | 31.35    | 0.45     | 47       | 0.5      |
| LP/J        | 1.1      | 0.1      | 46.55    | 1.55     | 14.05    | 0.35     | 3.25     | 0.45     | 30.2     | 0.3      | 50.4     | 0        |
| MA/MyJ      | 0.35     | 0.05     | 39.6     | 1.5      | 14.2     | 0.6      | 1.15     | 0.25     | 35.95    | 0.15     | 41       | 0.5      |
| NON/ShiLtJ  | 1.1      | 0.1      | 38.7     | 1.5      | 13.8     | 0.4      | 2.2      | 0.5      | 35.7     | 0.2      | 42.7     | 0        |
| NZW/LacJ    | 0.9      | NA       | 38.9     | 8.9      | 12.15    | 2.35     | 4.4      | NA       | 31.5     | 1.1      | 47.75    | 0.55     |
| PL/J        | 0.9      | 0.1      | 33.6     | 3.4      | 11       | 0.8      | 2.3      | 0.2      | 32.9     | 0.9      | 47.15    | 0.35     |
| RIIS/J      | 0.65     | 0.05     | 34.85    | 0.35     | 12.55    | 0.15     | 1.25     | 0.05     | 35.95    | 0.05     | 41.2     | 0.2      |
| SEA/GnJ     | 0.75     | 0.189297 | 52.825   | 1.985521 | 15.675   | 0.432772 | 2.3      | 0.380789 | 29.8     | 1.204159 | 47.725   | 0.309233 |
| SJL/J       | 0.85     | 0.05     | 33.1     | 3.4      | 11.95    | 1.05     | 3.35     | 0.05     | 36.15    | 0.45     | 41.65    |          |
