# Supplementary material
Source: PubMed Central journal article supplement (PMC3933005)
Supplement: NIHMS447054-supplement-335_2013_9448_MOESM3_ESM.pdf [file NIHMS447054-supplement-335_2013_9448_MOESM3_ESM.pdf]

| Strain      | MONO     |          | RBC      |          | RDW%     |          | WBC      |          |
|-------------|----------|----------|----------|----------|----------|----------|----------|----------|
| A/J         | 0.15     | 0.05     | 6.09     | 0.74     | 15.85    | 0.15     | 1.45     | 0.25     |
| AXB10/PgnJ  | 0.1      | 0        | 6.775    | 0.075    | 16.25    | 0.15     | 1.25     | 0.25     |
| AXB12/PgnJ  | 0.25     | 0.05     | 7.34     | 0.89     | 15.4     | 0.1      | 2.15     | 1.15     |
| AXB13/PgnJ  | 0.225    | 0.025    | 9.2375   | 0.386035 | 16.275   | 0.131498 | 3.75     | 0.627827 |
| AXB15/PgnJ  | 0.1      | 0        | 5.9      | 0.5      | 17.65    | 0.05     | 1.2      | 0.6      |
| AXB19/PgnJ  | 0.175    | 0.025    | 8.9325   | 0.334175 | 17.4     | 0.122474 | 2.775    | 0.337577 |
| AXB19b/PgnJ | 0.2      | 0.036515 | 7.386667 | 0.817381 | 17.36667 | 0.220101 | 2.716667 | 0.777782 |
| AXB2/PgnJ   | 0.15     | 0.05     | 6.17     | 4.07     | 15.05    | 0.75     | 1.25     | 0.75     |
| AXB23/PgnJ  | 0.225    | 0.025    | 7.7925   | 1.197924 | 15.375   | 0.201556 | 2.55     | 0.5058   |
| AXB24/PgnJ  | 0.3      | 0.2      | 8.56     | 0.43     | 17.05    | 0.15     | 3.8      | 1.7      |
| AXB4/PgnJ   | NA       | NA       | 8.94     | 1.53     | 18.6     | 0.4      | NA       | NA       |
| AXB5/PgnJ   | 0.25     | 0.05     | 7.2975   | 0.593807 | 14.9     | 0.208167 | 2.775    | 0.779289 |
| AXB6/PgnJ   | 0.275    | 0.085391 | 9.9      | 0.521009 | 16.025   | 0.143614 | 4.3      | 1.360147 |
| AXB8/PgnJ   | 0.25     | 0.05     | 8.4      | 1.1      | 17.45    | 0.25     | 3.45     | 0.65     |
| BALB/cJ     | 0.05     | 0.05     | 9.035    | 0.615    | 16.75    | 0.15     | 1.75     | 0.65     |
| BTBRt+/tfJ  | 0.4      | 0.1      | 8.085    | 0.125    | 15.35    | 0.05     | 4.7      | 0.8      |
| BUB/BnJ     | 0.3      | NA       | 8.83     | NA       | 15.5     | NA       | 2.6      | NA       |
| BXA1/PgnJ   | 0.2      | NA       | 8.39     | NA       | 17.4     | NA       | 1.6      | NA       |
| BXA11/PgnJ  | 0.2      | 0        | 8.03     | 0.67     | 16.35    | 0.55     | 2.75     | 0.35     |
| BXA12/PgnJ  | 0.4      | 0.2      | 7.785    | 1.005    | 17.25    | 0.15     | 6.35     | 3.55     |
| BXA13/PgnJ  | 0.2      | 0        | 9.985    | 0.125    | 16.2     | 0.1      | 2.2      | 0        |
| BXA14/PgnJ  | 0.15     | 0.05     | 7.785    | 1.265    | 17.85    | 0.05     | 1.9      | 0.5      |
| BXA16/PgnJ  | 0.2      | 0.057735 | 6.94     | 1.909214 | 17.9     | 0.472582 | 3.3      | 1.415392 |
| BXA2/PgnJ   | 0.2      | 0        | 9.185    | 0.335    | 17.4     | 0        | 2.35     | 0.55     |
| BXA24/PgnJ  | 0.2      | 0.1      | 8.61     | 0.26     | 17.1     | 0.2      | 2        | 1.2      |
| BXA25/PgnJ  | 0.2      | 0.1      | 5.455    | 1.695    | 17.75    | 0.25     | 1.7      | 0.8      |
| BXA26/PgnJ  | 0.15     | 0.05     | 8.965    | 0.725    | 15.05    | 0.15     | 3.1      | 1.5      |
| BXA4/PgnJ   | 0.05     | 0.05     | 7.1      | 1.54     | 16.35    | 0.55     | 0.65     | 0.15     |
| BXA7/PgnJ   | 0.2      | 0        | 8.63     | 0.3      | 15.65    | 0.05     | 2.6      | 1.3      |
| BXA8/PgnJ   | 0.2      | 0        | 8.875    | 0.865    | 17.5     | 0.1      | 1.8      | 0.1      |
| BXD1/TyJ    | 0.2      | NA       | 10.24    | NA       | 18       | NA       | 4.9      | NA       |
| BXD11/TyJ   | 0.2      | NA       | 7.52     | NA       | 16.9     | NA       | 1.7      | NA       |
| BXD12/TyJ   | 0.3      | 0        | 7.8      | 0.2      | 15.95    | 0.15     | 3.6      | 0.1      |
| BXD13/TyJ   | 0.25     | 0.15     | 8.47     | 1.05     | 16.55    | 0.15     | 3.7      | 2.1      |
| BXD14/TyJ   | 0.15     | 0.05     | 8.635    | 1.425    | 16.3     | 0.3      | 1.9      | 0.6      |
| BXD15/TyJ   | 0.3      | 0.1      | 8.93     | 0.23     | 18       | 0.2      | 3.3      | 0.3      |
| BXD18/TyJ   | 0.1      | NA       | 3.97     | NA       | 16.9     | NA       | 0.5      | NA       |
| BXD19/TyJ   | 0.233333 | 0.042164 | 8.213333 | 1.246926 | 17.7     | 0.382971 | 2.95     | 0.622227 |
| BXD2/TyJ    | 0.2      | 0        | 6.505    | 2.535    | 18.35    | 0.15     | 1.6      | 0.5      |
| BXD20/TyJ   | NA       | NA       | 10.87    | 0.49     | 18.65    | 0.05     | NA       | NA       |
| BXD22/TyJ   | 0.25     | 0.05     | 8.32     | 2.82     | 19.85    | 0.35     | 4.6      | 1.5      |
| BXD24/TyJ   | 0.25     | 0.05     | 7.915    | 1.915    | 16.45    | 0.35     | 3.85     | 0.95     |
| BXD24/TyJ   | 0.25     | 0.05     | 7.845    | 0.145    | 16.55    | 0.05     | 2.4      | 0.1      |
| BXD27/TyJ   | 0.3      | NA       | 6.68     | NA       | 18.3     | NA       | 2.2      | NA       |
| BXD28/TyJ   | 0.25     | 0.05     | 9.485    | 0.455    | 16.65    | 0.25     | 4.4      | 1.2      |
| BXD29/TyJ   | 0.35     | 0.05     | 8.67     | 0.12     | 19.55    | 0.05     | 3.45     | 1.35     |
| BXD32/TyJ   | 0.275    | 0.047871 | 9.56     | 0.642041 | 17.075   | 0.217466 | 3.325    | 0.694472 |
| BXD33/TyJ   | 0.35     | 0.05     | 6.25     | 0.21     | 18.6     | 0.1      | 4.1      | 0.4      |
| BXD34/TyJ   | 0.25     | 0.05     | 8.575    | 0.895    | 16.3     | 0        | 2.5      | 1.3      |
| BXD38/TyJ   | 0.3      | 0        | 8.645    | 0.595    | 18.3     | 0.1      | 2.7      | 0        |
| BXD39/TyJ   | 0.3      | NA       | 5.65     | NA       | 17       | NA       | 3        | NA       |
| BXD40/TyJ   | 0.2      | 0.1      | 6.115    | 0.415    | 16.6     | 0.1      | 2.1      | 1.4      |
| BXD42/TyJ   | 0.45     | 0.15     | 10.585   | 0.665    | 17.35    | 0.05     | 5.95     | 1.55     |
| BXD5/TyJ    | 0.25     | 0.05     | 8.335    | 0.485    | 18.25    | 0.75     | 3.05     | 0.95     |
| BXD6/TyJ    | 0.25     | 0.028868 | 9.2475   | 0.732033 | 17.325   | 0.201556 | 3.3      | 0.463681 |
| BXD8/TyJ    | NA       | NA       | 8.69     | 0.66     | 17.3     | 0        | NA       | NA       |
| BXD9/TyJ    | 0.4      | 0.1      | 7.845    | 2.015    | 16.4     | 0.5      | 5.75     | 2.45     |
| BXH10/TyJ   | 0.2      | NA       | 8.43     | NA       | 16.6     | NA       | 2.1      | NA       |
| BXH14/TyJ   | 0.25     | 0.05     | 9.83     | 0.21     | 17.45    | 0.15     | 2.35     | 0.65     |
| BXH19/TyJ   | 0.2      | 0        | 6.885    | 1.045    | 17.95    | 0.45     | 1.65     | 0.15     |
| BXH2/TyJ    | 0.3      | 0.2      | 6.14     | 1.07     | 18.25    | 0.25     | 2.5      | 1.3      |
| BXH20/KccJ  | 0.3      | 0.1      | 7.24     | 0.35     | 16.9     | 0        | 3        | 0.3      |
| BXH22/KccJ  | 0.2      | NA       | 6.61     | NA       | 18       | NA       | 2.8      | NA       |
| BXH4/TyJ    | 0.45     | 0.15     | 8.36     | 0.824085 | 15.825   | 0.283945 | 4.4      | 2.3      |
| BXH6/TyJ    | 0.2      | 0.1      | 6.435    | 1.045    | 14.4     | 0.1      | 2.75     | 0.55     |
| BXH7/TyJ    | 0.1      | 0        | 4.145    | 0.385    | 16.35    | 0.05     | 1.3      | 0.3      |
| BXH8/TyJ    | 0.2      | 0        | 8.9      | 0        | 15.75    | 0.05     | 2.4      | 0.2      |
| BXH9/TyJ    | 0.3      | 0.1      | 7.495    | 0.635    | 15.3     | 0.3      | 3.65     | 0.75     |
| C57BL/6J    | 0.166667 | 0.120185 | 5.94     | 1.161221 | 16.3     | 0.152753 | 2.466667 | 1.366667 |
| C57L/J      | 0.25     | 0.05     | 9.02     | 0.33     | 16.55    | 0.15     | 3.15     | 0.85     |
| C58/J       | 0.3      | 0.1      | 8.355    | 1.825    | 16.7     | 0.6      | 3.5      | 1.5      |
| CAST/EiJ    | 0.45     | 0.25     | 10.145   | 0.135    | 22.1     | 1.8      | 4.95     | 0.25     |
| CE/J        | 0.3      | 0.1      | 8.17     | 0.06     | 17.15    | 0.15     | 3        | 0.6      |
| CXB1/ByJ    | 0.55     | 0.073193 | 10.1525  | 0.166913 | 17.7625  | 0.128087 | 6.4875   | 1.05347  |
| CXB11/HiAJ  | 0.85     | 0.121008 | 10.5375  | 0.280992 | 18.4875  | 0.095314 | 9        | 1.287439 |
| CXB12/HiAJ  | 0.825    | 0.088135 | 10.72125 | 0.180767 | 16.25    | 0.13496  | 9.775    | 0.694301 |
| CXB13/HiAJ  | 0.625    | 0.130589 | 11.96625 | 0.179074 | 16.65    | 0.132288 | 7.5625   | 1.321922 |
| CXB2/ByJ    | 0.333333 | 0.055777 | 10.28833 | 0.476231 | 17.33333 | 0.102198 | 3.7      | 0.434358 |
| CXB3/ByJ    | 0.388889 | 0.026058 | 9.643333 | 0.507724 | 16.44444 | 0.661881 | 4.611111 | 0.482886 |
| CXB4/ByJ    | 0.6625   | 0.049776 | 10.95625 | 0.096787 | 18.0625  | 0.077776 | 7.3125   | 0.628046 |
| CXB6/ByJ    | 0.485714 | 0.059476 | 9.028571 | 0.329396 | 17.91429 | 0.103345 | 4.085714 | 0.488647 |
| CXB7/ByJ    | 0.871429 | 0.086504 | 11.2     | 0.089629 | 18.17143 | 0.108484 | 6.828571 | 0.810266 |
| CXB8/HiAJ   | 0.5      | 0.1      | 11.002   | 0.316076 | 15.8     | 0.122474 | 4.8      | 0.697854 |
| CXB9/HiAJ   | 0.45     | 0.10247  | 8.981429 | 0.258848 | 17.01429 | 0.088448 | 6.233333 | 1.829147 |
| DBA/2J      | 0.35     | 0.05     | 8.75     | 1.12     | 17.05    | 0.25     | 4.1      | 0.7      |
| FVB/NJ      | 0.25     | 0.05     | 6.78     | 0.04     | 16.4     | 0        | 2.55     | 0.25     |
| I/LnJ       | 0.2      | NA       | 6.48     | NA       | 15.8     | NA       | 2.5      | NA       |
| KK/HIJ      | 0.25     | 0.05     | 7.125    | 0.235    | 18.7     | 0.1      | 1.8      | 0.1      |
| LG/J        | 0.45     | 0.05     | 10.495   | 1.035    | 16.05    | 0.25     | 4.85     | 1.75     |
| LP/J        | 0.4      | 0        | 9.24     | 0.31     | 15.65    | 0.15     | 4.75     | 0.55     |
| MA/MyJ      | 0.25     | 0.05     | 9.655    | 0.235    | 17.7     | 0.2      | 1.75     | 0.35     |
| NON/ShiLtJ  | 0.35     | 0.05     | 9.06     | 0.34     | 17.95    | 0.05     | 3.65     | 0.65     |
| NZW/LacJ    | 0.4      | NA       | 8.12     | 1.77     | 16.7     | 0.3      | 5.7      | NA       |
| PL/J        | 0.35     | 0.05     | 7.12     | 0.66     | 15.2     | 0.1      | 3.55     | 0.05     |
| RIIS/J      | 0.2      | 0        | 8.465    | 0.125    | 17.55    | 0.25     | 2.1      | 0.1      |
| SEA/GnJ     | 0.275    | 0.025    | 11.06    | 0.390662 | 16.925   | 0.225    | 3.325    | 0.549811 |
| SJL/J       | 0.35     | 0.05     | 7.94     | 0.74     | 18.7     | 0.7      | 4.55     | 0.05     |
| SM/J        | NA       | NA       | 9.98     | 0.54     | 19       | 0.1      | NA       | NA       |
