# Supplementary material
Source: PubMed Central journal article supplement (PMC3933005)
Supplement: NIHMS447054-supplement-335_2013_9448_MOESM4_ESM.pdf [file NIHMS447054-supplement-335_2013_9448_MOESM4_ESM.pdf]

Table S2: Trait-trait correlations for hematological phenotypes

| <b>Phenotype</b> | GRAN     | HCT      | HGB      | LYMPH    | MCHC     | MCV      | MONO     | RBC      | RDW%     | WBC      |
|------------------|----------|----------|----------|----------|----------|----------|----------|----------|----------|----------|
| GRAN             | 1        | 0.392071 | 0.335287 | 0.744571 | -0.32508 | 0.204335 | 0.854948 | 0.362375 | 0.103103 | 0.855394 |
| HCT              | 0.392071 | 1        | 0.922743 | 0.483197 | -0.7311  | 0.532236 | 0.38133  | 0.910082 | -0.12101 | 0.483918 |
| HGB              | 0.335287 | 0.922743 | 1        | 0.480012 | -0.4293  | 0.249772 | 0.34285  | 0.961273 | 0.05055  | 0.465753 |
| LYMPH            | 0.744571 | 0.483197 | 0.480012 | 1        | -0.29569 | 0.137501 | 0.728358 | 0.508315 | 0.08769  | 0.981841 |
| MCHC             | -0.32508 | -0.7311  | -0.4293  | -0.29569 | 1        | -0.78709 | -0.30409 | -0.47803 | 0.386505 | -0.32068 |
| MCV              | 0.204335 | 0.532236 | 0.249772 | 0.137501 | -0.78709 | 1        | 0.1412   | 0.139949 | -0.59376 | 0.161264 |
| MONO             | 0.854948 | 0.38133  | 0.34285  | 0.728358 | -0.30409 | 0.1412   | 1        | 0.380561 | 0.160376 | 0.820344 |
| RBC              | 0.362375 | 0.910082 | 0.961273 | 0.508315 | -0.47803 | 0.139949 | 0.380561 | 1        | 0.130557 | 0.496145 |
| RDW%             | 0.103103 | -0.12101 | 0.05055  | 0.08769  | 0.386505 | -0.59376 | 0.160376 | 0.130557 | 1        | 0.101677 |
| WBC              | 0.855394 | 0.483918 | 0.465753 | 0.981841 | -0.32068 | 0.161264 | 0.820344 | 0.496145 | 0.101677 | 1        |
