# Supplementary material
Source: PubMed Central journal article supplement (PMC3933005)
Supplement: NIHMS447054-supplement-335_2013_9448_MOESM5_ESM.pdf [file NIHMS447054-supplement-335_2013_9448_MOESM5_ESM.pdf]

Table S3. R<sup>2</sup> values between red blood cell loci

|                  | mm37-1-<br>29056427 | mm37-1-<br>134905722 | mm37-7-<br>110098213 | mm37-<br>11-<br>56841408 | mm37-<br>12-<br>80028884 | mm37-<br>16-<br>15916062 |
|------------------|---------------------|----------------------|----------------------|--------------------------|--------------------------|--------------------------|
| mm37-1-29056427  | 1                   | 0.42617              | 0.01825              | 0.536669                 | 0.442669                 | 0.341198                 |
| mm37-1-134905722 | 0.42617             | 1                    | 0.031012             | 0.348688                 | 0.330774                 | 0.410105                 |
| mm37-7-111015676 | 0.014392            | 0.019738             | 1                    | 0.005907                 | 0.005656                 | 0.001058                 |
| mm37-11-56841408 | 0.536669            | 0.348688             | 0.005214             | 1                        | 0.377559                 | 0.351795                 |
| mm37-12-80028884 | 0.442669            | 0.330774             | 0.001818             | 0.377559                 | 1                        | 0.350452                 |
| mm37-16-15916062 | 0.341198            | 0.410105             | 0.002898             | 0.351795                 | 0.350452                 | 1                        |
