# Supplementary material
Source: PubMed Central journal article supplement (PMC3933005)
Supplement: NIHMS447054-supplement-335_2013_9448_MOESM6_ESM.pdf [file NIHMS447054-supplement-335_2013_9448_MOESM6_ESM.pdf]

Table S4. R<sup>2</sup> values between white cell loci

|                  | mm37-1-<br>25754577 | mm37-6-<br>135927582 | mm37-8-<br>8119195 | mm37-<br>11-<br>63825134 | mm37-<br>12-<br>79259640 | mm37-<br>15-<br>99555171 | mm37-<br>18-<br>70197956 |
|------------------|---------------------|----------------------|--------------------|--------------------------|--------------------------|--------------------------|--------------------------|
| mm37-1-25754577  | 1                   | 0.56024              | 0.471614           | 0.292889                 | 0.498438                 | 0.396433                 | 0.39919                  |
| mm37-6-135927582 | 0.56024             | 1                    | 0.401048           | 0.220542                 | 0.341198                 | 0.398155                 | 0.341198                 |
| mm37-8-8119195   | 0.471614            | 0.401048             | 1                  | 0.309474                 | 0.407607                 | 0.24576                  | 0.309602                 |
| mm37-11-63825134 | 0.292889            | 0.220542             | 0.309474           | 1                        | 0.247951                 | 0.292889                 | 0.247951                 |
| mm37-12-79259640 | 0.498438            | 0.341198             | 0.407607           | 0.247951                 | 1                        | 0.254202                 | 0.469346                 |
| mm37-15-99555171 | 0.396433            | 0.398155             | 0.24576            | 0.292889                 | 0.254202                 | 1                        | 0.537815                 |
| mm37-18-70197956 | 0.39919             | 0.341198             | 0.309602           | 0.247951                 | 0.469346                 | 0.537815                 | 1                        |
